# Supplementary material for: Solar hydrogen production via a Z-scheme water splitting system based solely on perovskite-type tantalum oxynitrides
Source: Royal Society of Chemistry journal article supplement (doi:10.1039/d4ta07592g), 2024-12-10
Supplement: d4ta07592g1.pdf [file d4ta07592g1.pdf]

## Solar Hydrogen Production via Z-Scheme Water Splitting System Based Solely on Perovskite-type Tantalum Oxynitrides

Wenpeng Li,<sup>a</sup> Akio Hirako,<sup>b</sup> Shuji Sekimori,<sup>b</sup> Rhauane Almeida Galvão,<sup>a</sup> Mamiko Nakabayashi,<sup>c</sup> Faze Wang,<sup>d</sup> Takashi Hisatomi,<sup>\*e</sup> Kazunari Domen<sup>\*e,f,g</sup>

<sup>a</sup> Graduate School of Medicine, Science and Technology, Shinshu University, Nagano, Japan

<sup>b</sup> Graduate School of Science and Technology, Shinshu University

<sup>c</sup> Institute of Engineering Innovation, School of Engineering, The University of Tokyo, Tokyo, Japan

<sup>d</sup> Research Initiative for Supra-Materials, Shinshu University, Nagano, Japan

<sup>e</sup> Institute for Aqua Regeneration, Shinshu University, Nagano, Japan

<sup>f</sup> Office of University Professors, The University of Tokyo, Japan

<sup>g</sup> Department of Chemistry, Kyung Hee University, Republic of Korea

\*Corresponding author

Kazunari Domen: domen@chemsys.t.u-tokyo.ac.jp

Takashi Hisatomi: hisatomi@shinshu-u.ac.jp

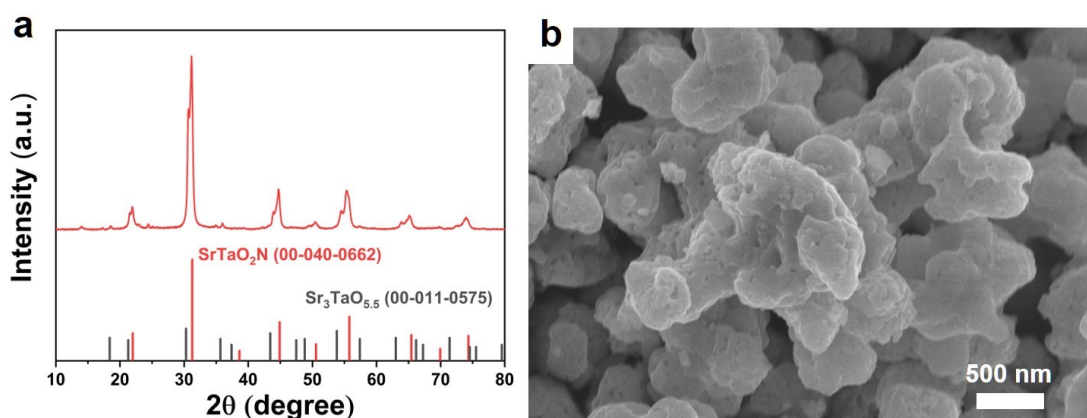

Figure S1. (a) XRD pattern and (b) SEM image for SrTaO<sub>2</sub>N(SSR).

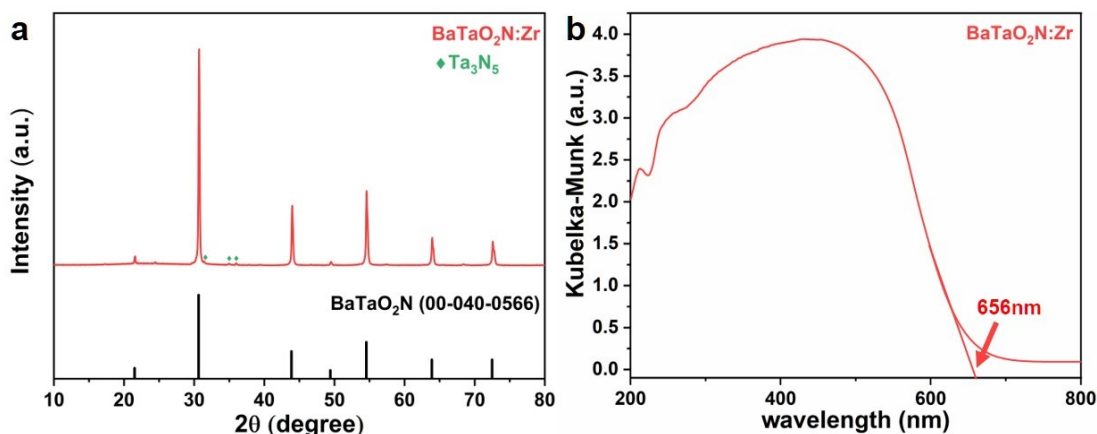

Figure S2. (a) XRD pattern and (b) UV-vis DRS spectrum for BaTaO<sub>2</sub>N:Zr.

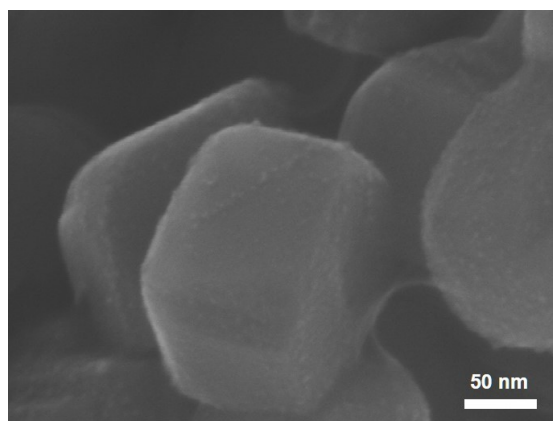

**Figure S3.** SEM image of  $\text{Cr}_2\text{O}_3/\text{Pt}/\text{BaTaO}_2\text{N}:\text{Zr}$ .

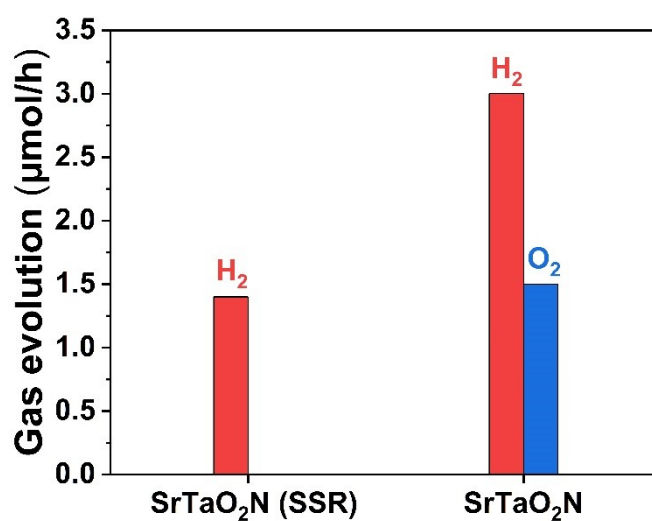

**Figure S4.** Photocatalytic activities for ZOWS systems based on different  $\text{SrTaO}_2\text{N}$  samples, as reflected by gas evolution rates. Reaction conditions: 50 mg HEP ( $\text{Cr}_2\text{O}_3/\text{Pt}/\text{BaTaO}_2\text{N}:\text{Zr}$ , 0.9 wt% Cr and 0.3 wt% Pt) and 100 mg OEP ( $\text{Pt}(\text{PD})/\text{CoO}_x/\text{SrTaO}_2\text{N}$ , 0.2 wt% Co and 0.2 wt% Pt); 150 mL of a 25 mM sodium phosphate buffer solution (pH 8) containing 1 mM  $[\text{Co}(\text{bpy})_3]^{3+/2+}$  ions; 300 W Xe lamp ( $\lambda \geq 420$  nm). The gas evolution rates represent the average values over a span of 10 h.

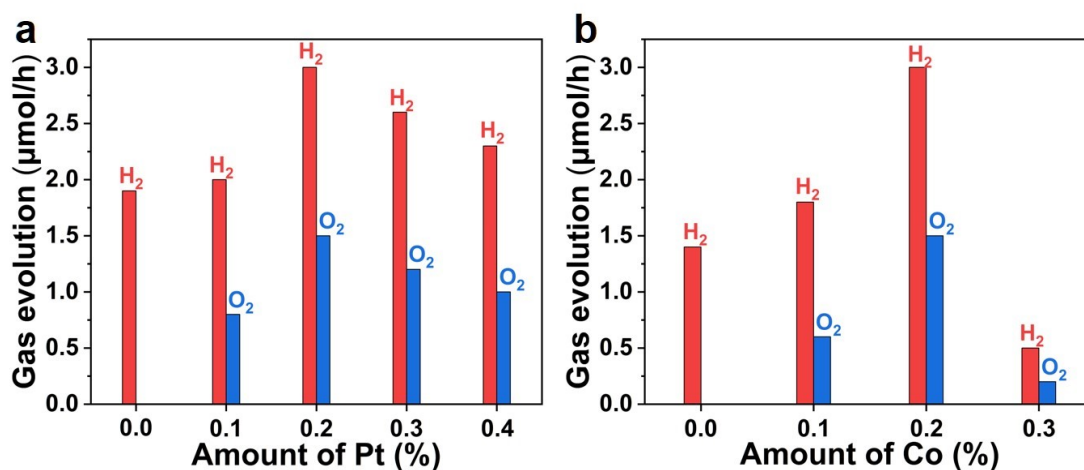

**Figure S5.** Effect of amount of (a) Pt(PD) and (b) CoO<sub>x</sub> loaded onto SrTaO<sub>2</sub>N on photocatalytic ZOWS activity for BaTaO<sub>2</sub>N:Zr-[Co(bpy)<sub>3</sub>]<sup>3+/2+</sup>-SrTaO<sub>2</sub>N system. Reaction conditions: 50 mg HEP (Cr<sub>2</sub>O<sub>3</sub>/Pt/BaTaO<sub>2</sub>N:Zr, 0.9 wt% Cr and 0.3 wt% Pt) and 100 mg OEP (Pt(PD)/CoO<sub>x</sub>/SrTaO<sub>2</sub>N, 0.2 wt% Co and 0.2 wt% Pt); 150 mL of a 25 mM sodium phosphate buffer solution (pH 8) containing 1 mM [Co(bpy)<sub>3</sub>]<sup>3+/2+</sup> ions; 300 W Xe lamp ( $\lambda \geq 420$  nm).

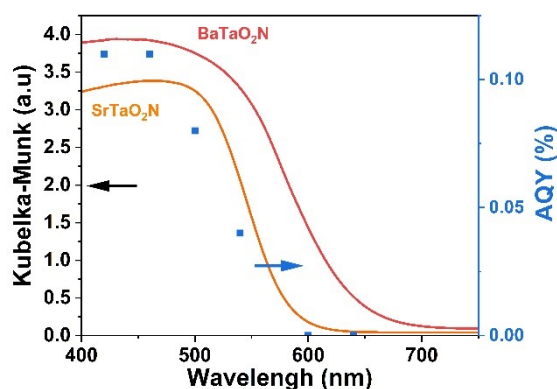

**Figure S6.** AQY as function of incident-light wavelength during ZOWS using BaTaO<sub>2</sub>N:Zr-[Co(bpy)<sub>3</sub>]<sup>3+/2+</sup>-SrTaO<sub>2</sub>N system. Reaction conditions: 50 mg HEP (Cr<sub>2</sub>O<sub>3</sub>/Pt/BaTaO<sub>2</sub>N:Zr, 0.9 wt% Cr and 0.3 wt% Pt) and 100 mg OEP (Pt(PD)/CoO<sub>x</sub>/SrTaO<sub>2</sub>N, 0.2 wt% Co and 0.2 wt% Pt); 150 mL of a 25 mM sodium phosphate buffer solution (pH 8) containing 1 mM [Co(bpy)<sub>3</sub>]<sup>3+/2+</sup> ions; 300 W Xe lamp with various bandpass filters.

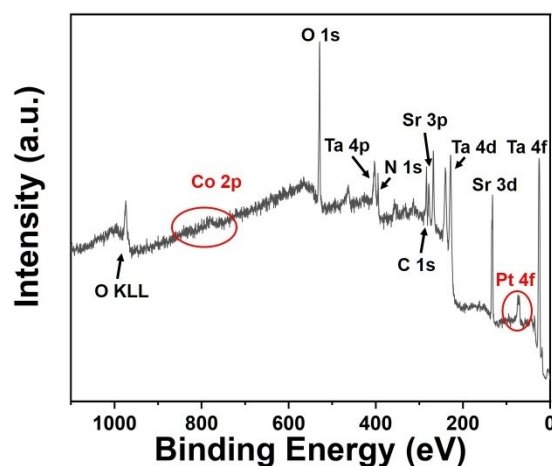

Figure S7. XPS spectrum of Pt(PD)/CoO<sub>x</sub>/SrTaO<sub>2</sub>N.

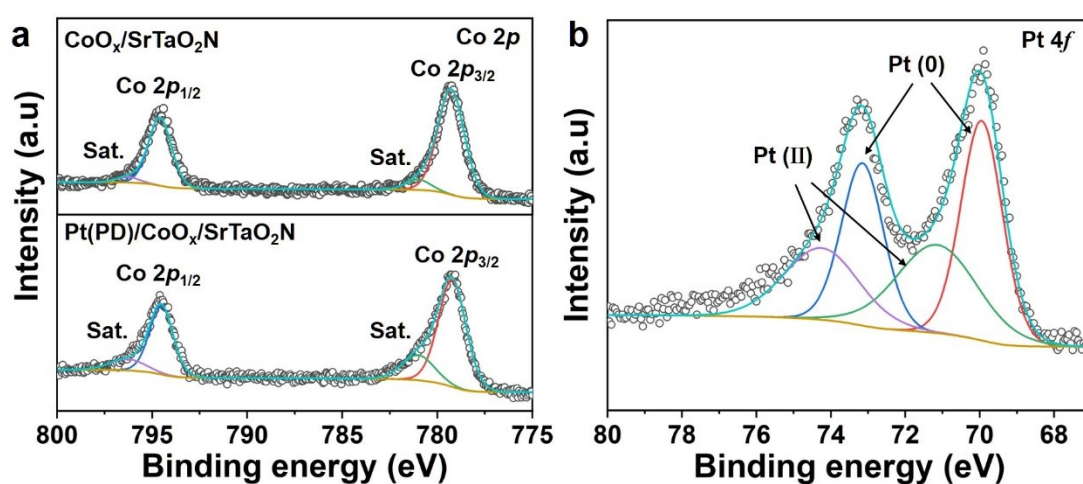

Figure S8. (a) Co 2p XPS spectra of Pt(PD)/CoO<sub>x</sub>/SrTaO<sub>2</sub>N before and after Pt(PD) loading and (b) Pt 4f XPS spectrum of same material.

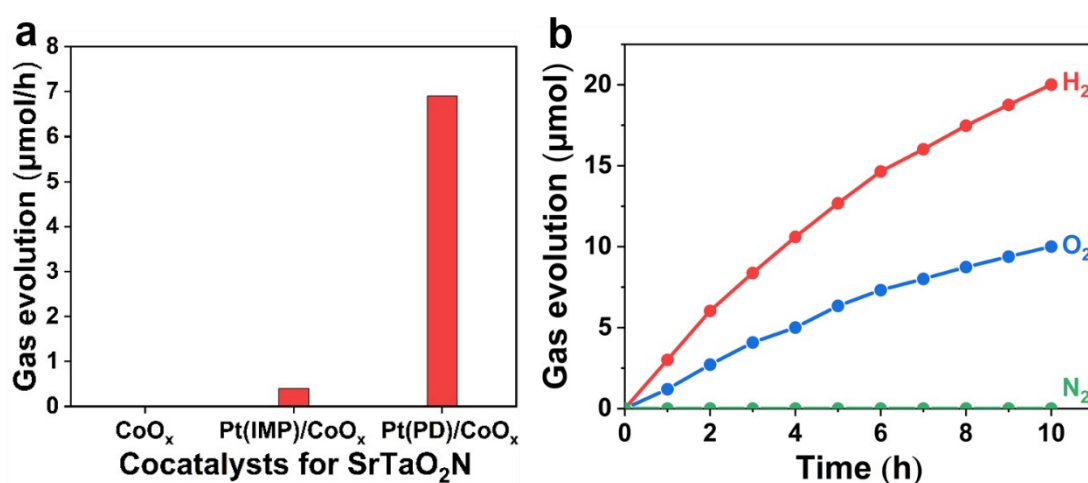

Figure S9. (a) Photocatalytic O<sub>2</sub> evolution activity for SrTaO<sub>2</sub>N with various cocatalysts in 150 mL of aqueous 50 mM sodium phosphate buffer solution (pH 8) containing 5 mM K<sub>3</sub>[Fe(CN)<sub>6</sub>]. (b) Time course of gas evolution during the ZOWS reaction under visible light. Reaction conditions: 50 mg HEP (Cr<sub>2</sub>O<sub>3</sub>(0.9 wt%)/Pt(0.3

wt%)/BaTaO<sub>2</sub>N:Zr) and 100 mg OEP (Pt(PD)/CoO<sub>x</sub>/SrTaO<sub>2</sub>N, 0.2 wt% Co and 0.2 wt% Pt); 150 mL of 25 mM sodium phosphate buffer solution (pH 8) containing 1 mM K<sub>4</sub>Fe(CN)<sub>6</sub> ions; 300 W Xe lamp ( $\lambda \geq 420$  nm).

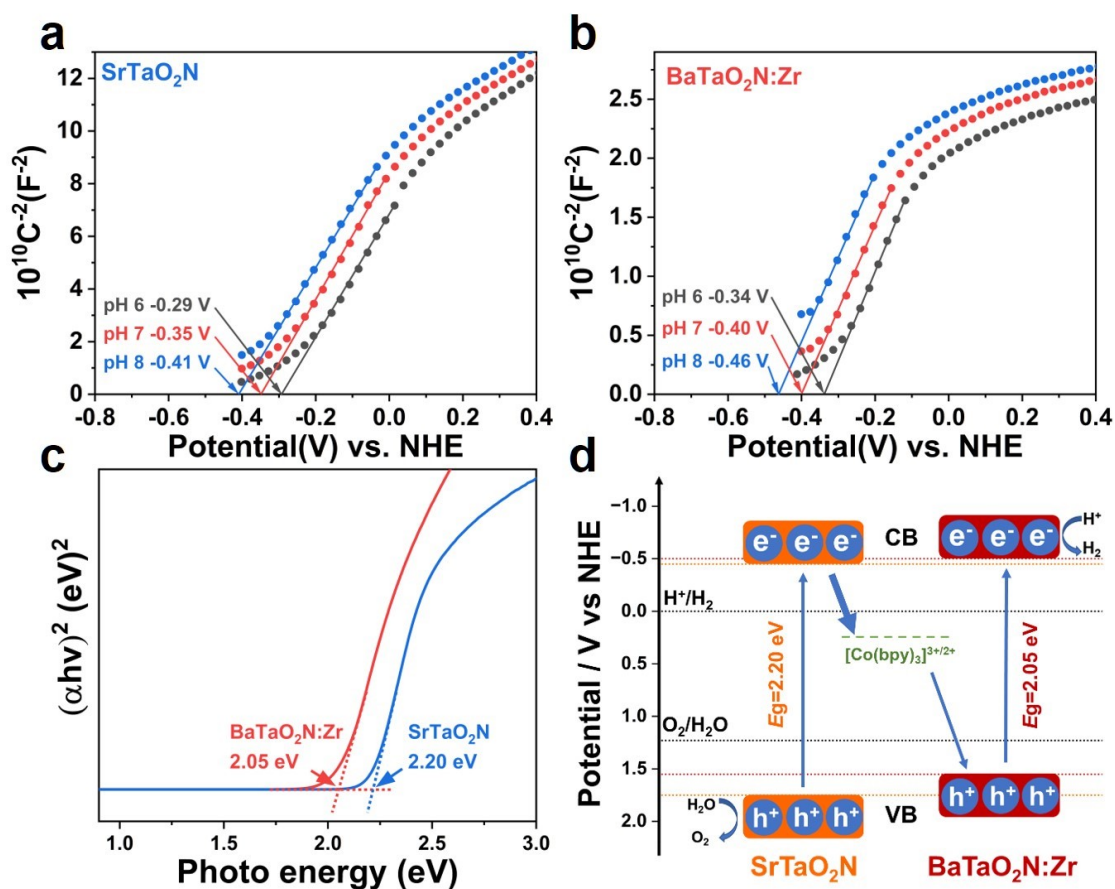

**Figure S10** Mott-Schottky (MS) plots of (a) SrTaO<sub>2</sub>N and (b) BaTaO<sub>2</sub>N:Zr at a fixed frequency of 1000 Hz, with the flat band potentials determined by extrapolating the MS curves to the energy axis. (c) Bandgap of SrTaO<sub>2</sub>N and BaTaO<sub>2</sub>N:Zr calculated from the DRS data. (d) Energy diagram of the Z-scheme system (BaTaO<sub>2</sub>N:Zr-[Co(bpy)<sub>3</sub>]<sup>3+/2+</sup>-SrTaO<sub>2</sub>N), including water redox potentials at pH 7. CB and VB indicate conduction band and valence band, respectively.

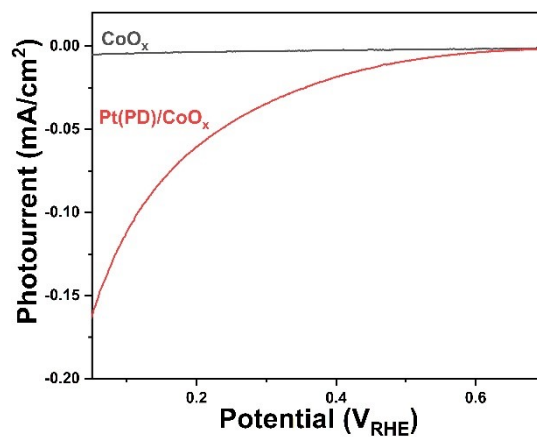

**Figure S11.** O<sub>2</sub> reduction current density for CoO<sub>x</sub>/SrTaO<sub>2</sub>N/Ti and Pt(PD)/CoO<sub>x</sub>/SrTaO<sub>2</sub>N/Ti photoanodes under dark conditions as functions of applied potential. Reaction conditions: 0.1 M sodium phosphate buffer solution (pH 8) saturated with O<sub>2</sub>.
